# Supplementary material for: RoboOligo: software for mass spectrometry data to support manual and de novo sequencing of post-transcriptionally modified ribonucleic acids
Source: PubMed Central journal article supplement — Nucleic Acids Res. 2015 Mar 27;43(10):e64. doi: 10.1093/nar/gkv145 (PMC4446411; doi:10.1093/nar/gkv145), 2015-03-27

# RoboOligo Performance Tests

# Robo Oligo speed test

Machine information:

Intel Core i5-3330 CPU @ 3.00Ghz 3.00Ghz

RAM 8G

Time vs. Number of Modification

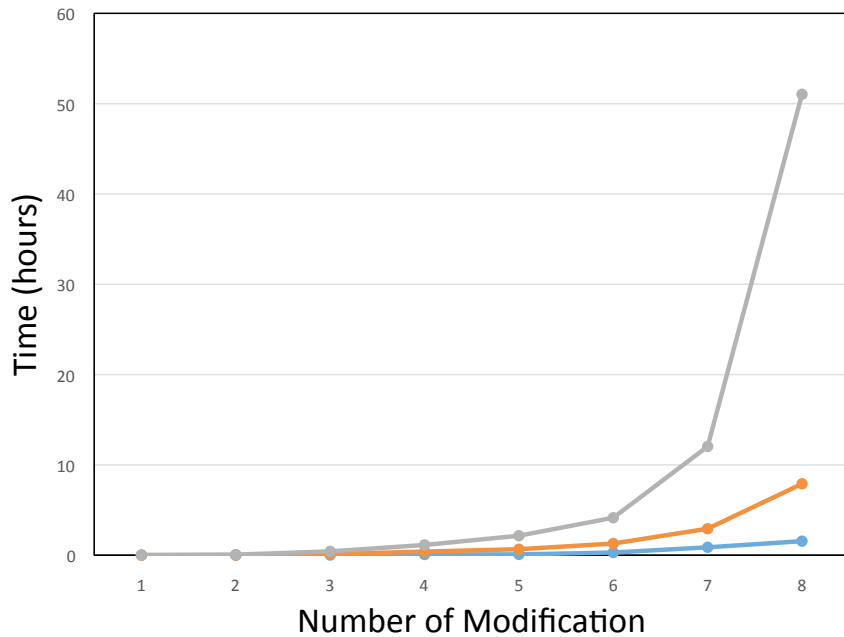

|               | Number of precursor |          |          |         |
|---------------|---------------------|----------|----------|---------|
| number of mod | 920                 | 1420     | 2330     |         |
| 0             | 10.888              | 23.122   | 26.605   |         |
| 1             | 11.448              | 26.97    | 69.722   |         |
| 2             | 20.399              | 71.045   | 162.55   |         |
| 3             | 94.309              | 366.498  | 1084.74  |         |
| 4             | 309.497             | 1165.036 | 2624.421 |         |
| 5             | 347.297             | 2058.577 | 5379.083 |         |
| 6             | 1093.717            | 3581.815 | 10277.6  |         |
| 7             | 3163.331            | 7411.531 | 32781.84 |         |
| 8             | 5623.234            | 22847.26 | 155277.5 |         |
|               |                     |          |          | Time(s) |

| # of Mod | First version | Second version | Third version |
|----------|---------------|----------------|---------------|
| 0        | 0.17          | 0.18           | 0.18          |
| 2        | 0.23          | 0.24           | 0.24          |
| 4        | 0.44          | 0.44           | 0.44          |
| 6        | 0.95          | 0.98           | 0.99          |
| 8        | 2.42          | 2.45           | 2.48          |
| 10       | 5.63          | 5.69           | 5.59          |
| 12       | 11.78         | 11.53          | 11.73         |
| 14       | 21.76         | 21.91          | 21.85         |
| 16       | 41.60         | 43.07          | 42.38         |

Time (min)

Parameters:

1000 precursors from *E. coli* total tRNA

CID product tolerance = 1

Total tolerance = 2.

Versions 0116, 0119 and 0129 – all builds appear stable

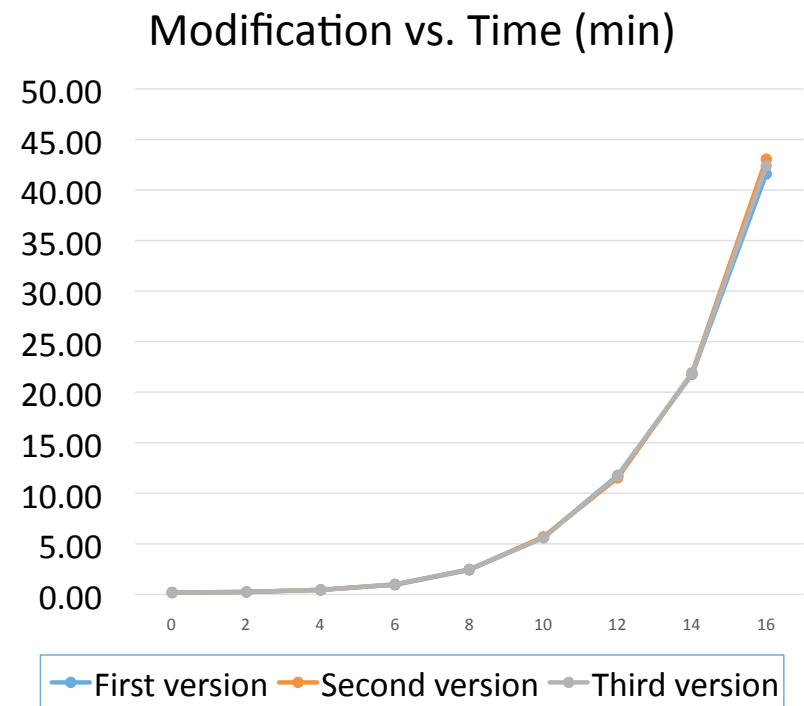

Supplement: supp_gkv145_nar-01176-met-k-2014-File004.pdf [file supp_gkv145_nar-01176-met-k-2014-File004.pdf]
